# Supplementary material for: Membrane protein channels equipped with a cleavable linker for inducing catalysis inside nanocompartments
Source: Royal Society of Chemistry journal article supplement (doi:10.1039/d1tb01463c), 2021-01-01
Supplement: d1tb01463c1.pdf [file d1tb01463c1.pdf]

## SUPPORTING INFORMATION

# Membrane protein channels equipped with a cleavable linker for inducing catalysis inside nanocompartments

*Luisa Zartner<sup>a</sup>, Viviana Maffei<sup>a,b</sup>, Cora-Ann Schoenenberger<sup>a,b</sup>, Ionel Adrian Dinu<sup>a,b</sup>, Cornelia*

*G. Palivan<sup>a,b\*</sup>*

<sup>a</sup>Department of Chemistry, University of Basel, BPR1096, Mattenstrasse 24a, 4058 Basel,  
Switzerland

<sup>b</sup>NCCR-Molecular Systems Engineering, BPR1095, Mattenstrasse 24a, 4058 Basel, Switzerland

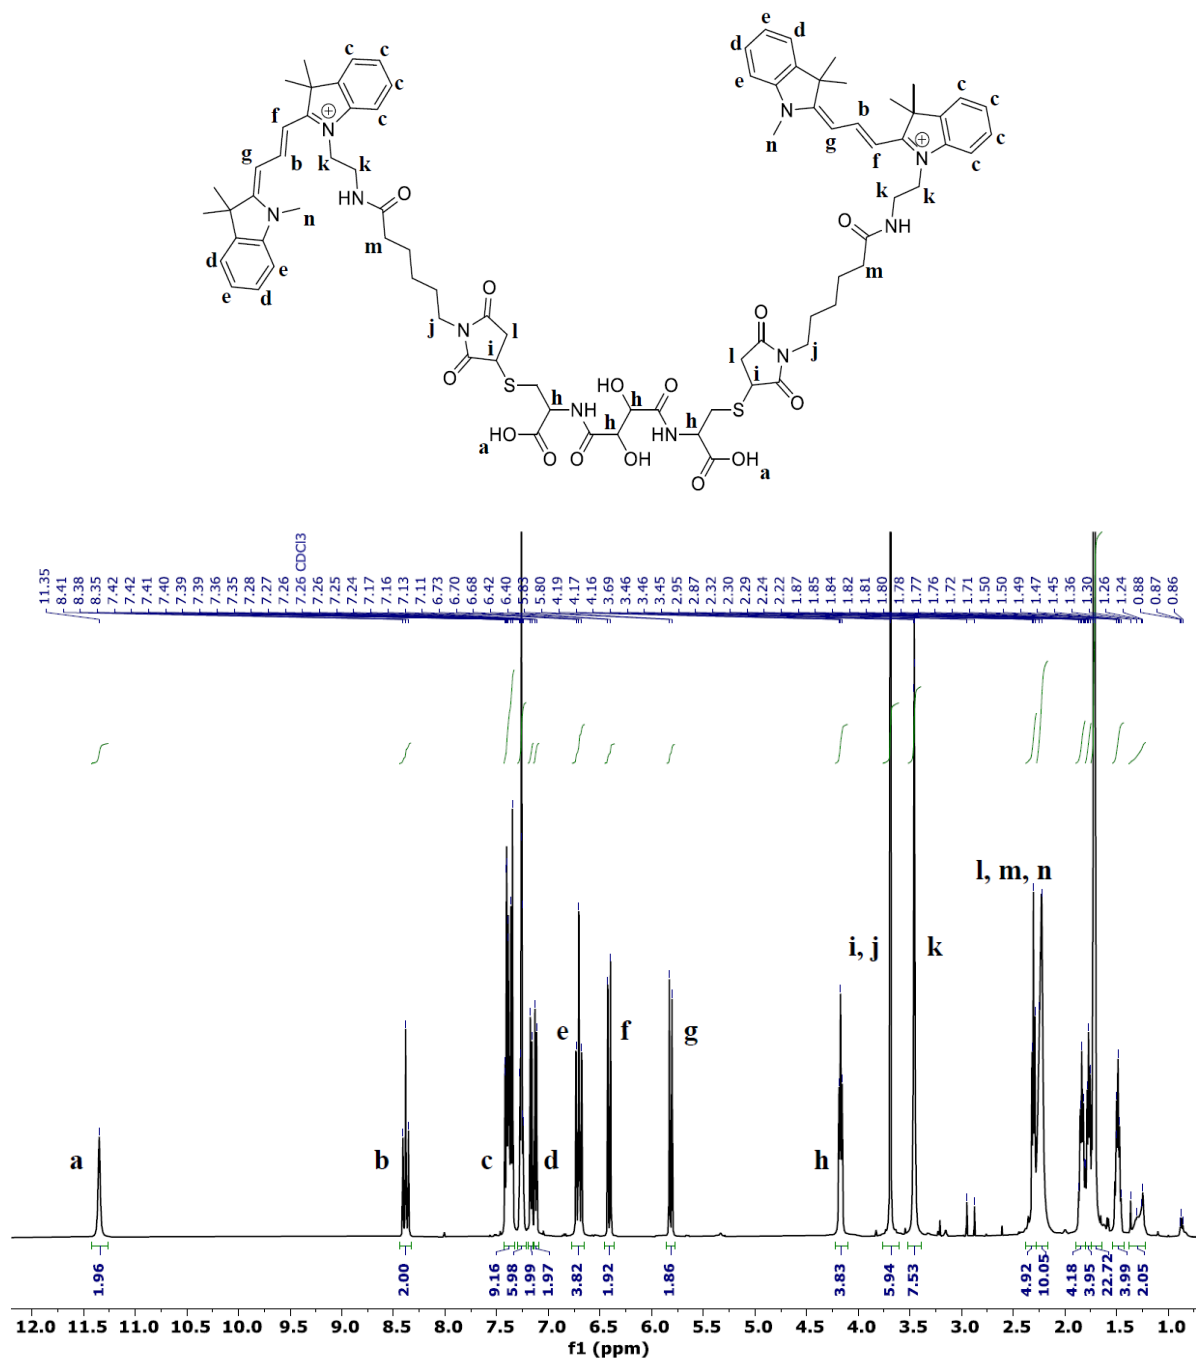

Figure S1. <sup>1</sup>H-NMR spectrum of Compound 2 in CDCl<sub>3</sub> at 500 MHz.

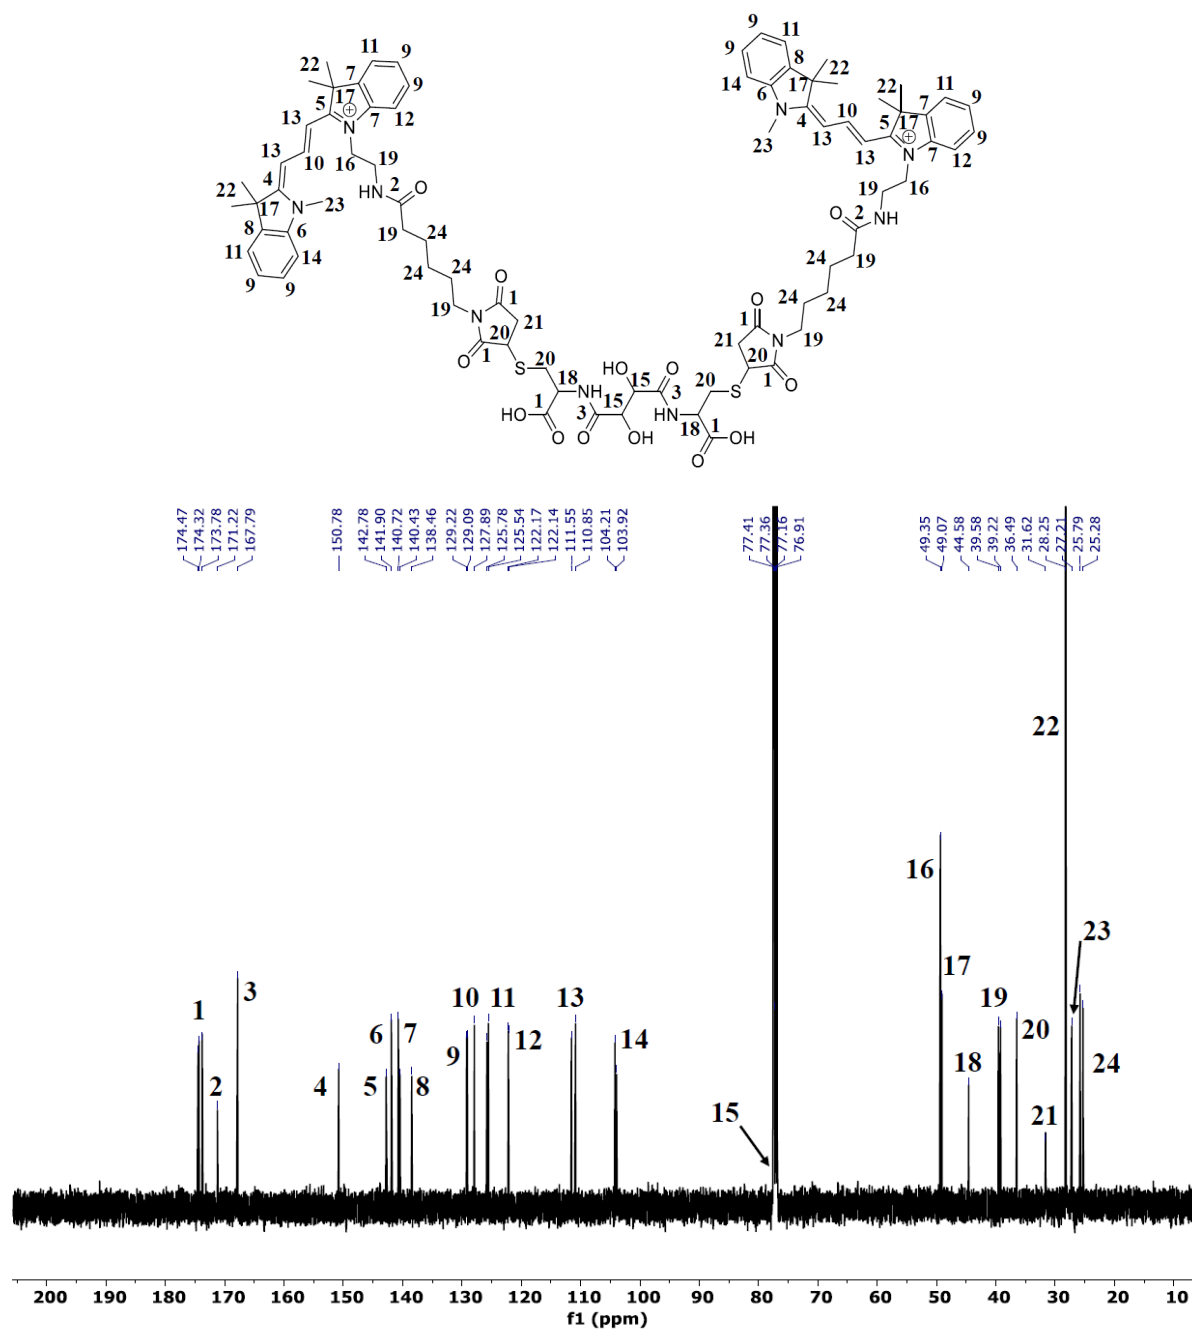

Figure S2.  $^{13}\text{C}$ -NMR spectrum of Compound 2 in  $\text{CDCl}_3$  at 126 MHz.

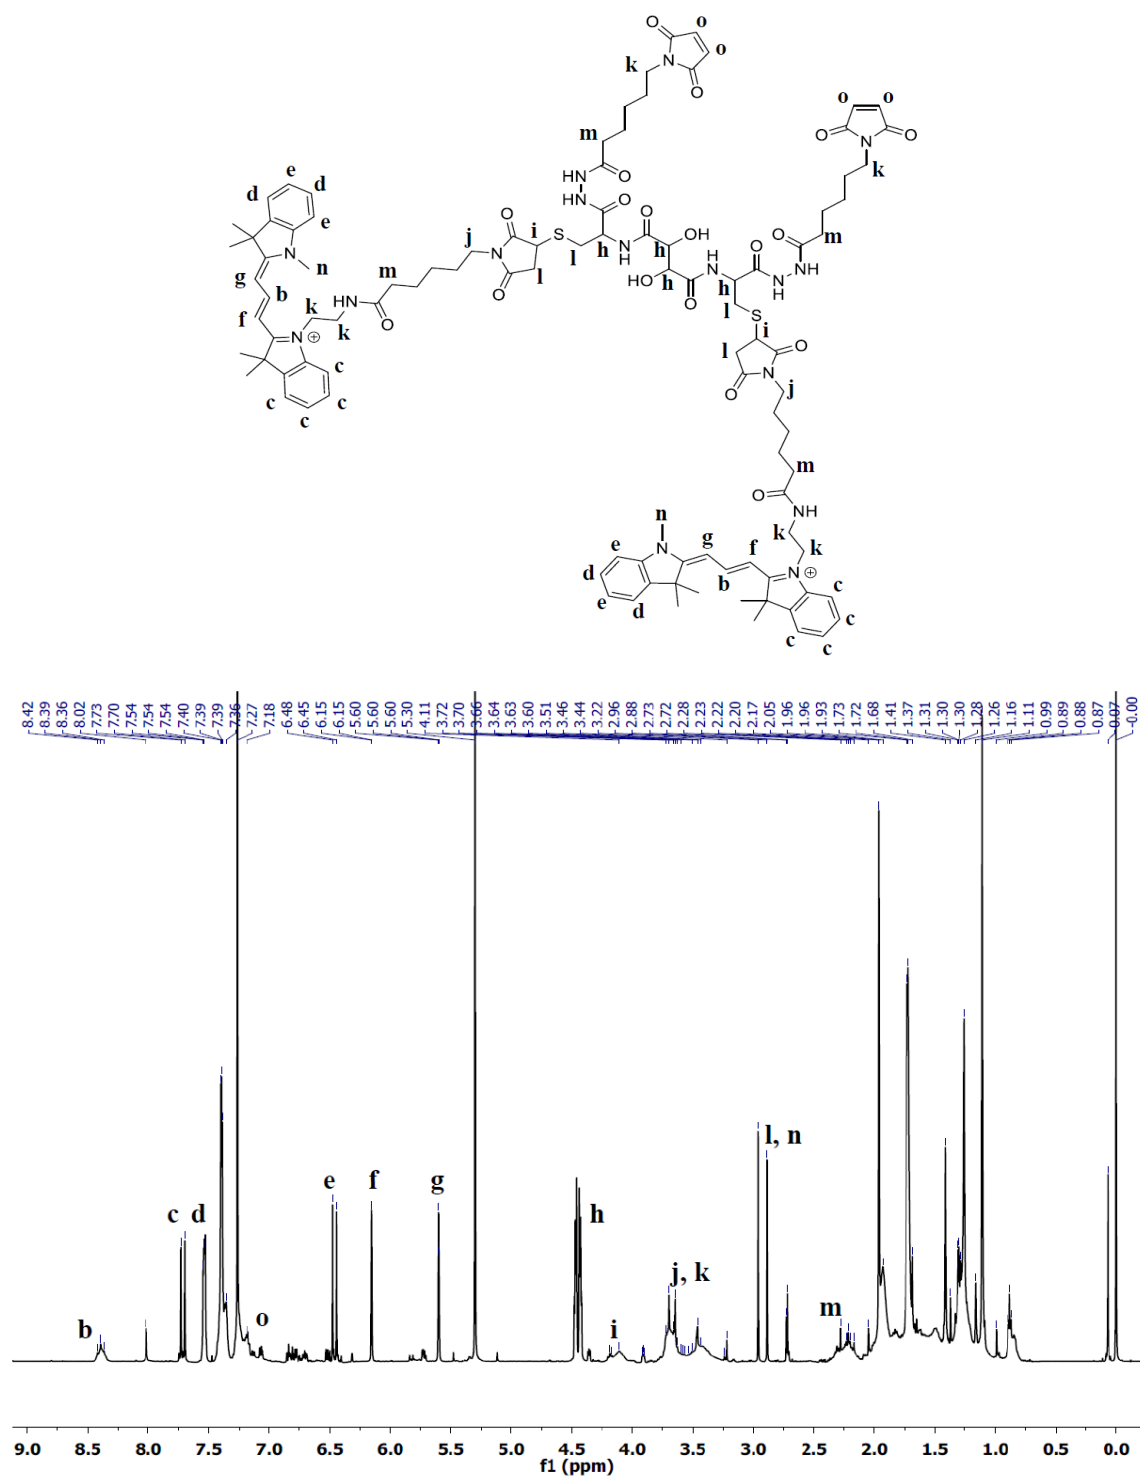

**Figure S3.** <sup>1</sup>H-NMR spectrum of the bismaleimide linker in CDCl<sub>3</sub> at 500 MHz.

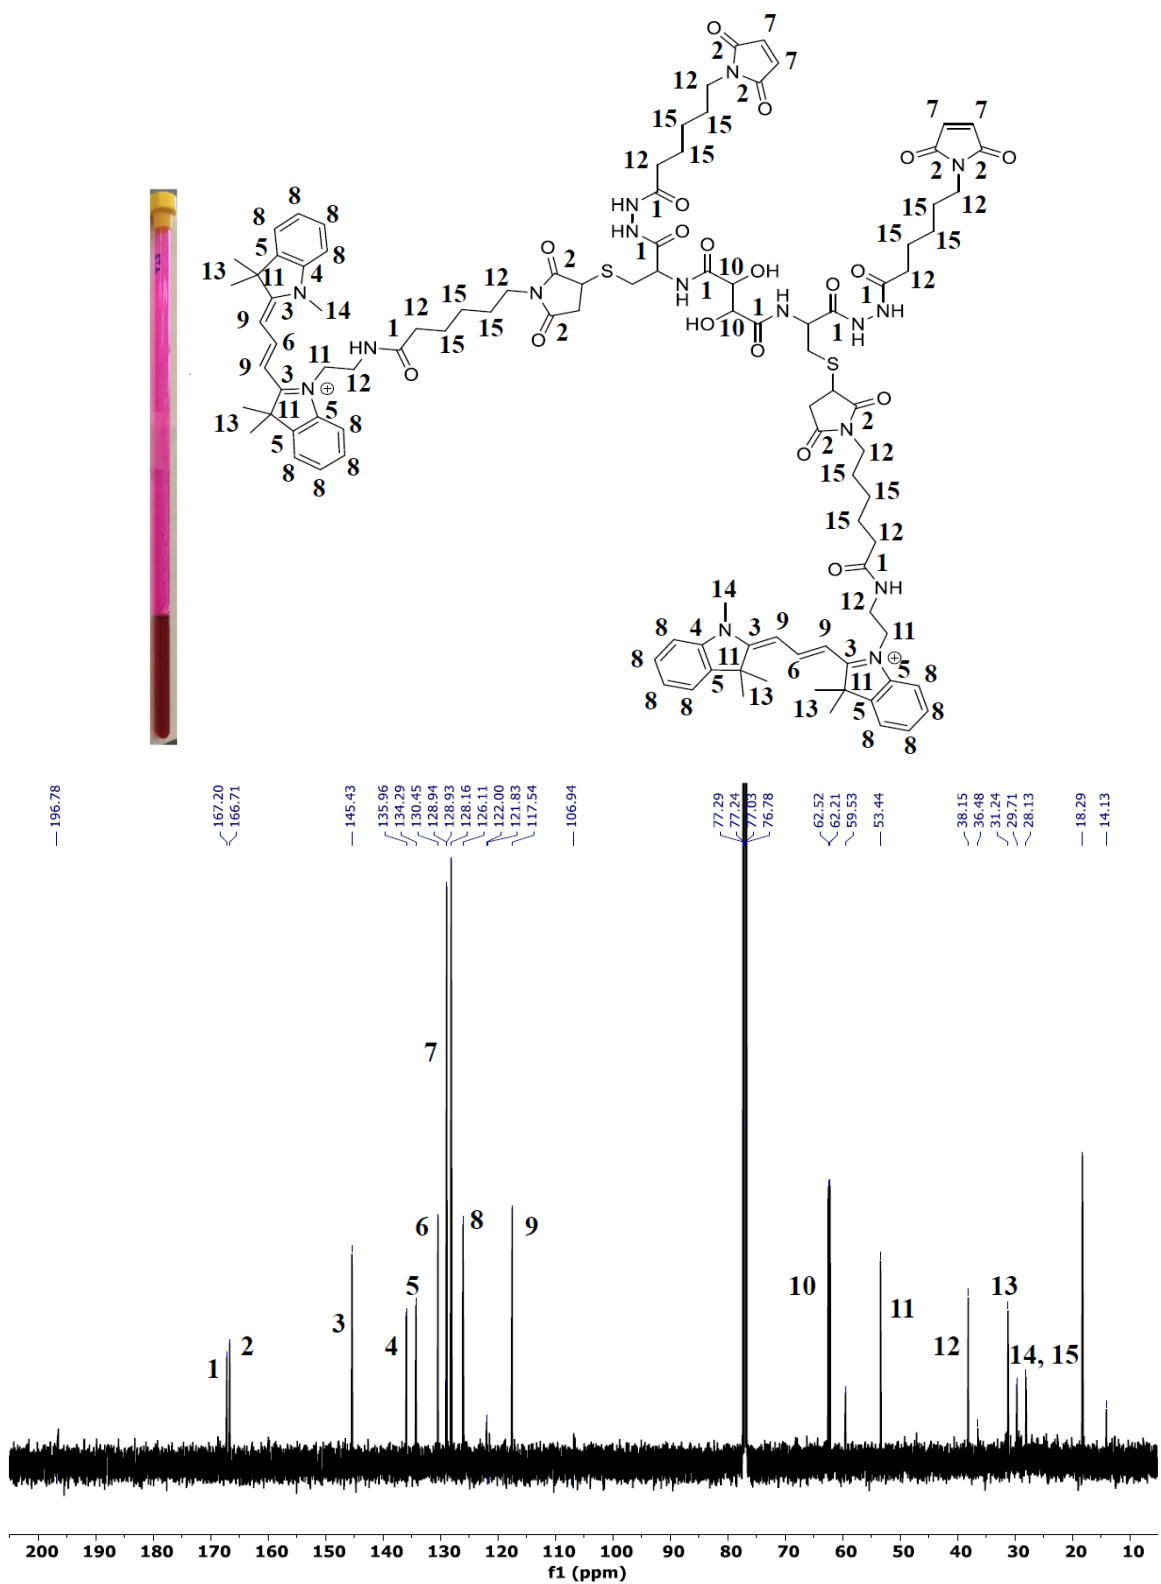

**Figure S4.**  $^{13}\text{C}$ -NMR spectrum of the bismaleimide linker in  $\text{CDCl}_3$  at 126 MHz and the image of the corresponding dissolved linker in the NMR tube.

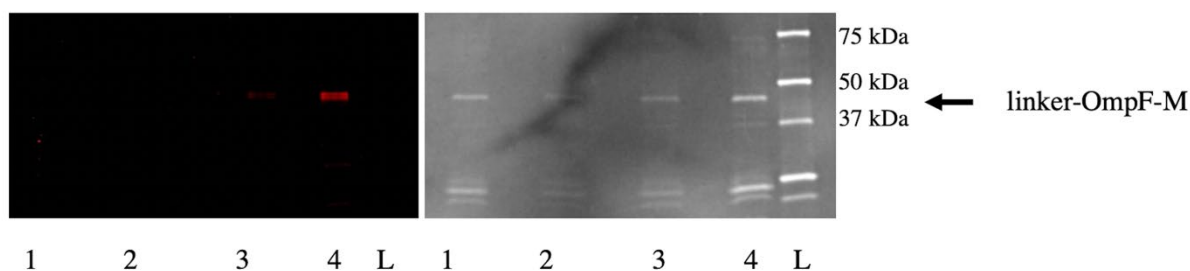

**Figure S5.** SDS PAGE of OmpF-M (*left*, fluorogram; *right*, Coomassie-stained): L: Protein ladder; 1, 2: unlabeled OmpF-M, at 1/1 (1) and 2/1 (2) ratio (v/v) with loading buffer; 3, 4: OmpF-M labelled with the linker comprising fluorescent cyanine3 ( $\lambda_{ex} = 550 \text{ nm} / \lambda_{em} = 580 \text{ nm}$ ).  $M_W$  of OmpF around 40 kDa.

**Table S1.** Fluorescence correlation parameters of the free fluorophore cyanine3 maleimide, free linker, CNCs with OmpF-M-linker inserted in the membrane, stand-alone OmpF-M-linker, and OmpF-M-linker added to empty polymersomes before and after staining the polymersomes with BODIPY 630/650-X.

|                                        | Counts per molecule (kHz) | Diffusion time ( $\mu\text{s}$ ) |
|----------------------------------------|---------------------------|----------------------------------|
| Cyanine3 maleimide                     | 1.7                       | 61                               |
| Linker                                 | 2.3                       | 70                               |
| OmpF-M-Linker CNCs                     | 28.3                      | 4530                             |
| Linker-OmpF-M                          | 3.1                       | 452                              |
| CNCs AND linker- OmpF-M without BODIPY | 7.0                       | 452                              |
| CNCs AND linker-OmpF-M with BODIPY     | 138.3                     | 6000                             |

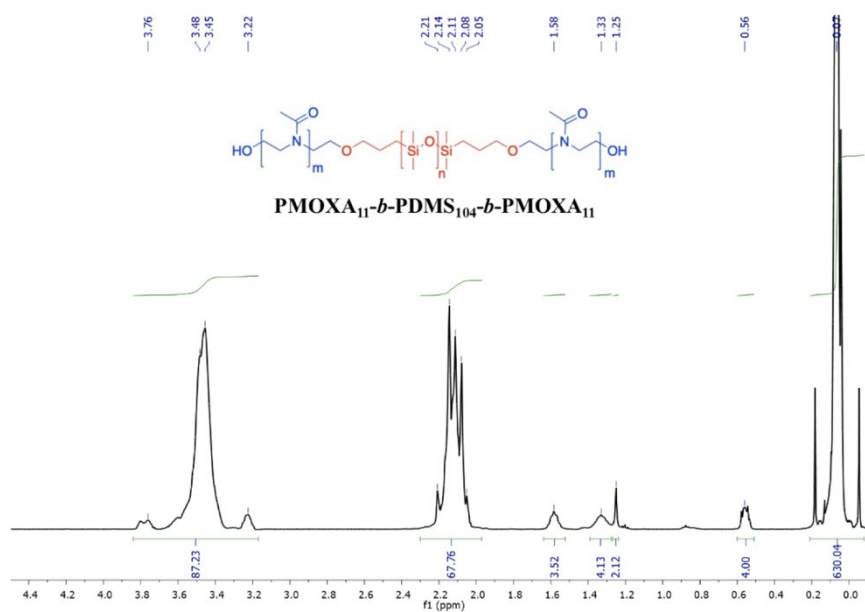

**Figure S6.** <sup>1</sup>H-NMR spectrum of poly(2-methyl-2-oxazoline)-*b*-poly(dimethylsiloxane)-*b*-poly(2-methyl-2-oxazoline) triblock copolymer (PMOXA<sub>11</sub>-*b*-PDMS<sub>104</sub>-*b*-PMOXA<sub>11</sub>) in CDCl<sub>3</sub> at 500 MHz.

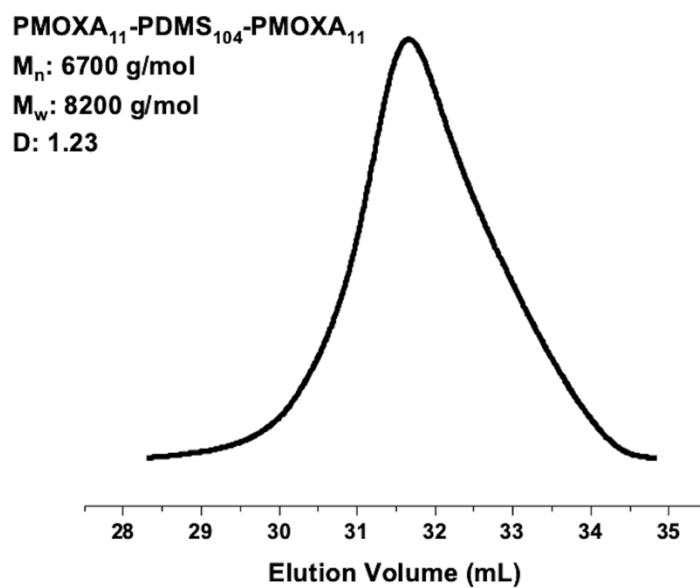

**Figure S7.** Elugram (GPC) of PMOXA<sub>11</sub>-*b*-PDMS<sub>104</sub>-*b*-PMOXA<sub>11</sub> in DMF.

**Table S2.** Data from NTA measurements of CNC-noOmpF, CNC-linker-OmpF-M, CNC-OmpF-M, and CNC-OmpF-WT samples diluted 1:1000 in PBS.

|                              | CNC-noOmpF                                    | CNC-linker-OmpF-M                             | CNC-OmpF-M                                    | CNC-OmpF-WT                                   |
|------------------------------|-----------------------------------------------|-----------------------------------------------|-----------------------------------------------|-----------------------------------------------|
| diameter (nm)                | 202 ± 47                                      | 192 ± 42                                      | 182 ± 42                                      | 215 ± 49                                      |
| concentration (particles/mL) | 2.6 × 10 <sup>8</sup> ± 1.6 × 10 <sup>7</sup> | 1.8 × 10 <sup>8</sup> ± 4.5 × 10 <sup>6</sup> | 3.1 × 10 <sup>8</sup> ± 1.7 × 10 <sup>7</sup> | 3.8 × 10 <sup>8</sup> ± 2.4 × 10 <sup>7</sup> |

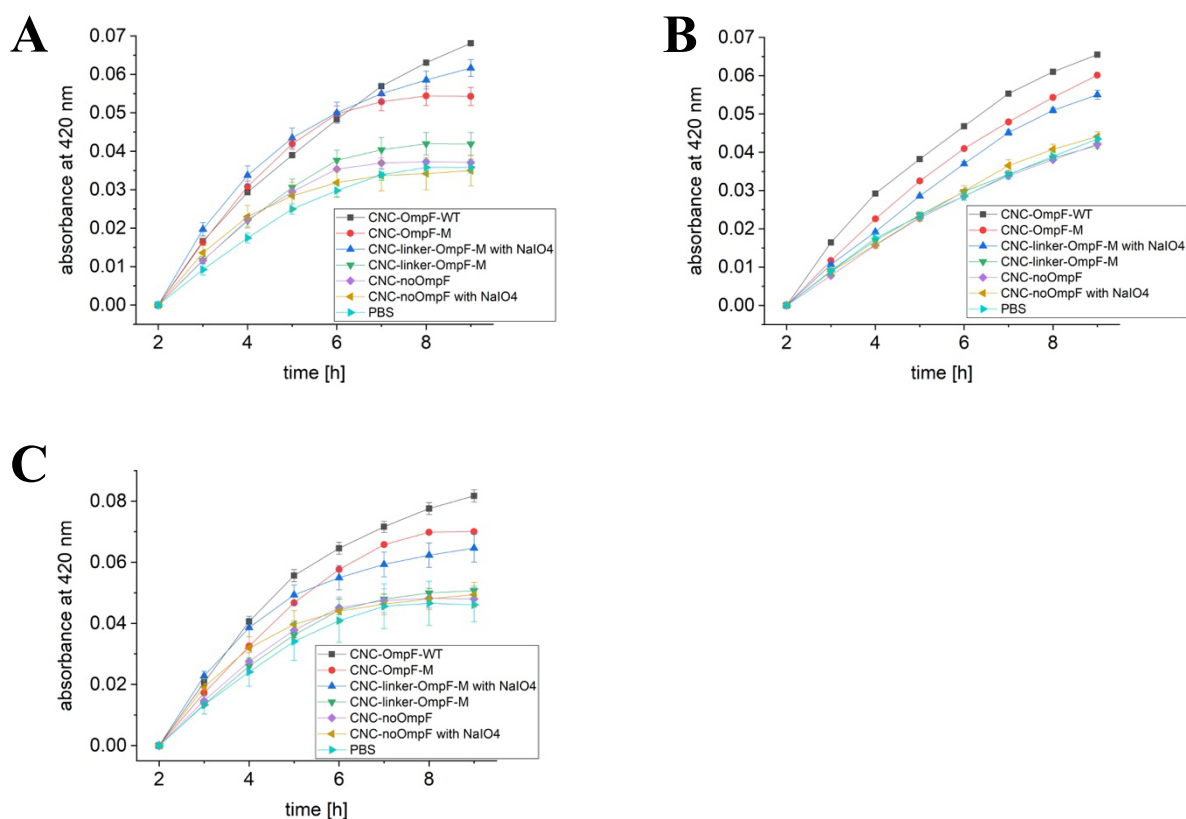

**Figure S8.** Laccase activity of CNCs in response to NaIO<sub>4</sub>. Measurements were carried out in triplicate at pH 7.4, over 9 h at RT: ABTS in PBS with CNC-OmpF-WT (black), ABTS in PBS with CNC-OmpF-M (red), ABTS in PBS with CNC-linker-OmpF-M in the presence (green) and absence of NaIO<sub>4</sub> (blue), CNC-noOmpF without (purple) and with NaIO<sub>4</sub> (yellow), and ATBS in PBS (turquoise). (A-C) represent 3 independent CNC preparations (each with standard deviation).



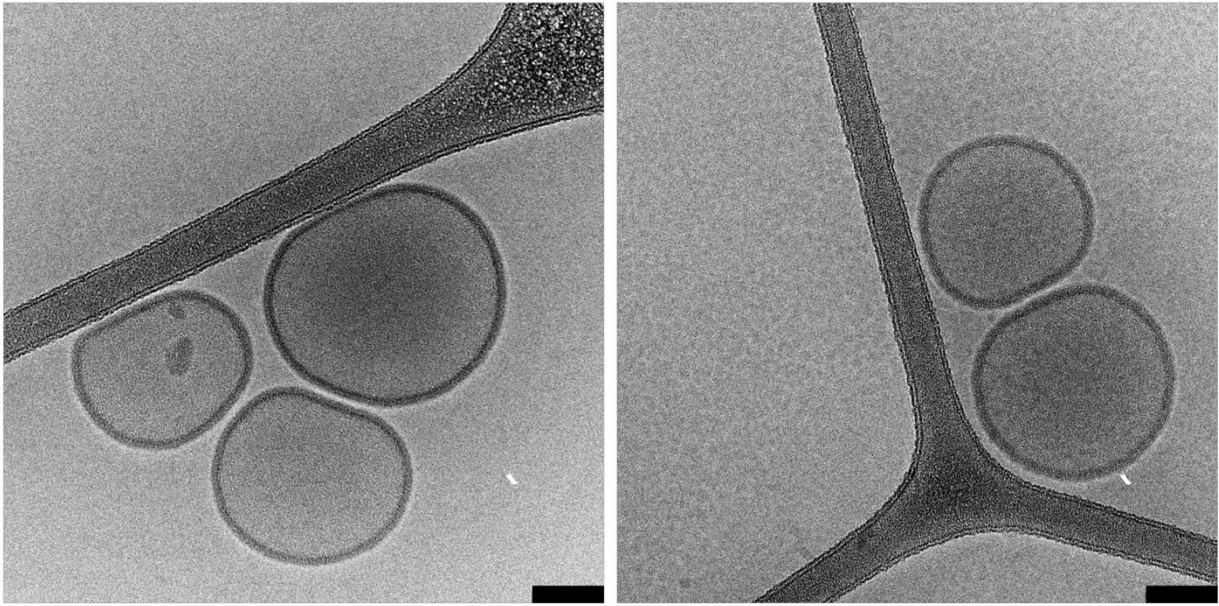

**Figure S9.** Cryo-TEM micrographs of polymersomes self-assembled from PMOXA<sub>11</sub>-*b*-PDMS<sub>104</sub>-*b*-PMOXA<sub>11</sub>. Scale bars: 100 nm

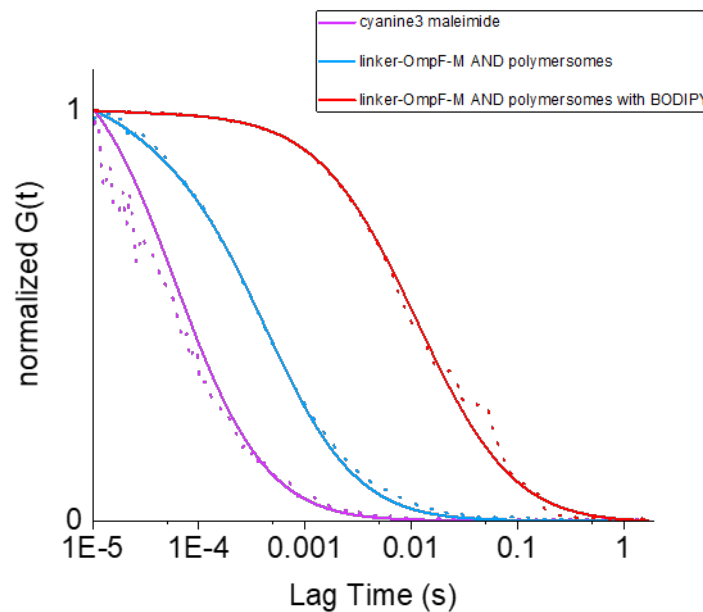

**Figure S10.** FCS autocorrelation curves (solid line) and raw data (dots) of PBS solutions of cyanine3 maleimide (pink), OmpF-M-linker in 1% OG added to empty polymersomes without BODIPY 630/650-X (blue) and stained with BODIPY 630/650-X (red).

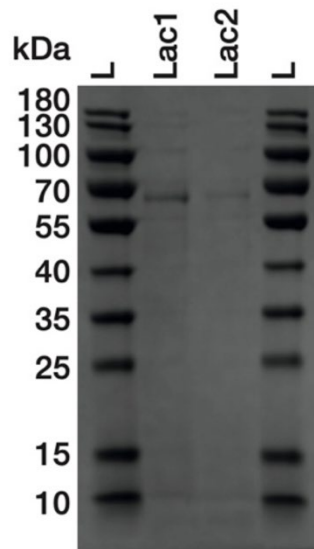

**Figure S11.** SDS PAGE of fungal laccase from *Agaricus bisporus*: L: Protein ladder; Lac1: 10  $\mu\text{g}$  laccase; Lac2: 5  $\mu\text{g}$  laccase.

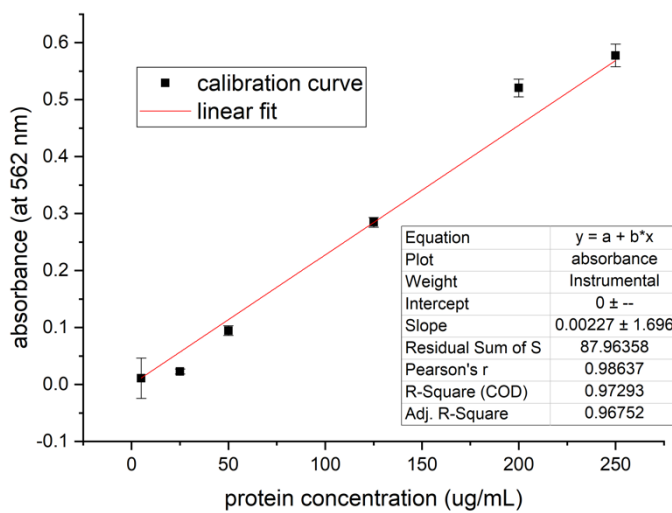

**Figure S12.** Calibration curve for BCA assay performed according to the supplier's protocol (Thermo Fisher Scientific, U.S.A.)
